# A Bayesian Generative Model of Vestibular Afferent Neuron Spiking.

Michael Paulin<sup>1</sup>, Kiri Pullar<sup>1</sup>, and Larry Hoffman<sup>2</sup>

<sup>1</sup>*Department of Zoology, University of Otago, Dunedin, New Zealand; and*

<sup>2</sup>*Department of Head & Neck Surgery and Brain Research Institute,  
David Geffen School of Medicine at UCLA,  
Los Angeles, California 90095-1624*

Abbreviated title: Stochastic models of vestibular afferent activity

Text pages:

Figures:

Tables:

Abstract words:

Introduction words:

Discussion words:

Correspondence to:

Conflict of Interest: The authors declare no competing financial interests.

Acknowledgements: The authors gratefully acknowledge the support of the NIH toward the conduct of this research (1R01DC014368 to LFH and MGP, and 1R01DC005059 to LFH).

1 **Abstract**

2 Using an information criterion to evaluate models fitted to spike train data from chinchilla  
3 semicircular canal afferent neurons, we found that the superficially complex functional  
4 organization of the canal nerve branch can be accurately quantified in an elegant mathematical  
5 model with only three free parameters. Spontaneous spike trains are samples from stationary  
6 renewal processes whose interval distributions are Exwald distributions, convolutions of Inverse  
7 Gaussian and Exponential distributions. We show that a neuronal membrane compartment is a  
8 natural computer for calculating parameter likelihoods given samples from a point process with  
9 such a distribution, which may facilitate fast, accurate, efficient Bayesian neural computation for  
10 estimating the kinematic state of the head. The model suggests that Bayesian neural computation  
11 is an aspect of a more general principle that has driven the evolution of nervous system design,  
12 the energy efficiency of biological information processing.

13 ***Significance Statement***

14 Nervous systems ought to have evolved to be Bayesian, because Bayesian inference allows  
15 statistically optimal evidence-based decisions and actions. A variety of circumstantial evidence  
16 suggests that animal nervous systems are indeed capable of Bayesian inference, but it is  
17 unclear how they could do this. We have identified a simple, accurate generative model of  
18 vestibular semicircular canal afferent neuron spike trains. If the brain is a Bayesian observer  
19 and a Bayes-optimal decision maker, then the initial stage of processing vestibular information  
20 must be to compute the posterior density of head kinematic state given sense data of this form.  
21 The model suggests how neurons could do this. Head kinematic state estimation given point-  
22 process inertial data is a well-defined dynamical inference problem whose solution formed a  
23 foundation for vertebrate brain evolution. The new model provides a foundation for developing  
24 realistic, testable spiking neuron models of dynamical state estimation in the vestibulo-  
25 cerebellum, and other parts of the Bayesian brain.

26

## 27 **Introduction**

28       The vestibular organs enable agile movement and perceptual acuity by providing the brain  
29 with sense data for spatial orientation and postural stability. Among the five sensory epithelia  
30 within the mammalian vestibular labyrinth, three semi-circular canal cristae each detect head  
31 rotation around a single axis. Dedicated branches of the vestibular nerve transmit information  
32 from each semicircular canal to the brain (Goldberg et al., 2012). Early recordings indicated that  
33 the population firing rate within each nerve branch encodes the rate at which the head is turning  
34 around the canal axis (Lowenstein & Sand, 1940), but single-unit recordings later revealed  
35 systematic, correlated statistical and dynamical heterogeneity within each population (Goldberg  
36 & Fernandez, 1971b). The pattern of vestibular afferent neuron behaviour is similar in all  
37 vertebrates and has been described using a variety of mathematical models (Paulin & Hoffman,  
38 2019), but remains unexplained. Why is low-dimensional sensory information about head rotation  
39 around a single axis distributed across such a large number of channels in parallel? Why are the  
40 spike trains so noisy? Why are the statistical and dynamical properties of these neurons so  
41 diverse, and why are they correlated? At first sight information transmission in the vestibular  
42 nerve seemed simple: Firing rate encodes stimulus strength. But it turns out to be much more  
43 complicated than that. Why?

44       We hypothesized that these questions can be answered by modelling the activity of vestibular  
45 sensory afferent neurons as observations for a Bayesian observer, whose goal is to infer what in  
46 the world is causing the observations. In this paper we explain how we identified a Bayesian  
47 generative model of spontaneous firing in vestibular semi-circular canal afferent neurons, and  
48 how it may provide a foundation for modelling neural mechanisms of perception as Bayesian  
49 inference.

50       A Bayesian observer represents relevant states of the environment and themselves using a  
51 probability distribution, called the Bayesian posterior distribution. They apply Bayes rule to infer

52 the posterior, the conditional probability distribution of states given what they observe (Gelman et  
53 al., 2013; Jaynes & Bretthorst, 2003; Kruschke, 2015). Bayesian inference allows statistically  
54 optimal evidence-based decisions and actions (Berger, 1985). This has led to speculation that  
55 our nervous systems ought to have evolved to be Bayesian, with selective fitness as an  
56 optimization criterion (Doya, 2007; Knill & Pouget, 2004; Knill & Richards, 1996; Kording, 2007;  
57 Kording & Wolpert, 2006; Levy, 2006; O'Reilly, Jbabdi, & Behrens, 2012; Ramirez & Marshall,  
58 2017; Yuille & Kersten, 2006). The behaviour of humans and other animals is consistent with this  
59 “Bayesian brain” hypothesis (Ostwald et al., 2012; Valone, 2006). However, because Bayesian  
60 inference is conditional not only on observations but also on a model of how observations depend  
61 on states, and optimality criteria can be arbitrary, it is possible to reverse-engineer a Bayesian  
62 explanation for any observed behaviour (Bowers & Davis, 2012; Jones & Love, 2011). Thus  
63 realistically modelling neural computation for Bayesian inference, and testing the Bayesian brain  
64 hypothesis, requires neurobiological model systems whose performance can be quantified  
65 independently and for which observer models can be determined empirically. We suggest that  
66 the vestibular system, including the vestibulo-cerebellum, which has long been proposed as a  
67 locus of Bayesian neural computation for dynamical estimation of head kinematic state variables  
68 (Borah, Young, & Curry, 1988; de Xivry, Coppe, Blohm, & Lefevre, 2013; MacNeilage, Ganesan,  
69 & Angelaki, 2008; Paulin, 1989, 1993, 2005; Paulin & Hoffman, 2011; Selva & Oman, 2012;  
70 Young, 2011), is suitable for this purpose.

71       Except in some classical special cases, dynamical Bayesian inference requires a generative  
72 model, a model capable of generating simulated observations with the same statistical distribution  
73 as the data. Given such a model, sequential random sampling methods can be used to infer the  
74 Bayesian posterior density of the model parameters from data (Doucet, De Freitas, & Gordon,  
75 2001). Mathematical parameters of a realistic generative model will map onto to kinematic state  
76 variables of the head, the physical parameters of vestibular afferent neuron spike trains. Thus a

77 first step towards a realistic model of Bayesian neural computation for optimal dynamical head  
78 kinematic state estimation in the vestibulo-cerebellum is to identify a generative model of  
79 vestibular sensory afferent neuron spike trains.

80

## 81 **Methods**

82 All procedures involving animals were approved by the UCLA Chancellor's Animal Research  
83 Committee, and conformed to guidelines mandated in the *NIH Guide for the Care and Use of*  
84 *Laboratory Animals* (National Institutes of Health Publication, revised 2011), and the *Guidelines*  
85 *for the Use of Animals in Neuroscience Research* (Society for Neuroscience).

### 86 *Animal preparation*

87 Adult male chinchillas (n=27; body mass 450 – 650 grams) were used in these experiments.  
88 They were first anesthetized with isoflurane, after which an intravenous cannula was secured  
89 within a jugular vein through which maintenance doses of sodium pentobarbital (0.05cc, 50 mg/cc)  
90 were administered. A tracheotomy was performed into which a catheter delivering 100% O<sub>2</sub> was  
91 loosely placed. Heart and respiratory rates, as well as O<sub>2</sub> saturation levels, were monitored  
92 throughout the surgical preparation and recording session. Core body temperature was  
93 maintained between 38° - 38.5°C with a custom servo-controlled heater and rectal thermocouple  
94 probe. Animals remained physiologically stable throughout the long electrophysiologic recording  
95 sessions, which at times lasted longer than 12 hours.

96 Upon achieving a surgical plane of anesthesia animals were fit into a custom head holder  
97 fixed to a turntable. Surgical procedures were similar to those utilized in previous investigations  
98 of vestibular afferent electrophysiology (Baird, Desmadryl, Fernandez, & Goldberg, 1988). The  
99 right middle ear was exposed by removing the bony cap of the tympanic bulla. The bony ampullae  
100 of the superior and horizontal semicircular canals were identified, which provided landmarks to

101 the internal vestibular meatus channelling the superior vestibular nerve between the labyrinth and  
102 brainstem. The superior vestibular nerve was exposed at this site, approximately 1 – 2 mm from  
103 the landmark ampullae, using fine diamond dental drill bits. Final exposure of the nerve was  
104 achieved by gently teasing the epineurium from the nerve with electrolytically sharpened pins.

#### 105 *Single afferent electrophysiology*

106 Spontaneous discharge epochs from 330 semicircular afferents within the superior vestibular  
107 nerve were recorded with high-impedance microelectrodes (40 – 60M $\Omega$ ) driven by a piezoelectric  
108 microdrive. Spontaneous discharge was detected as the electrode approached an afferent, and  
109 generally improved with subtle adjustments in electrode position achieved by small manipulations  
110 of the microdrive (e.g. small forward and reverse displacements, in addition to gentle tapping of  
111 the drive). Upon achieving stable recording, manual turntable displacements were used to identify  
112 the epithelium from which the afferent projected. Afferents innervating the horizontal and superior  
113 cristae increased their discharge to rotations resulting in utriculofugal and utriculopetal endolymph  
114 flow, respectively, and would decrease in discharge in response to turntable rotations in the  
115 opposite direction. Afferents projecting to the utricle were generally unresponsive to rotations, or  
116 increased their discharge during application of rotations in both directions (centripetal  
117 displacements of the otolithic membrane concomitant with rotation in either direction). These  
118 afferents were excluded from the present dataset.

#### 119 *Spiketrain analysis and model fitting*

#### 120 *Data acquisition, Summary Statistics and Exploratory Analysis*

121 Single-unit spike times were acquired in 20-second records with 300 $\mu$ s resolution, and  
122 imported into MATLAB as arrays of interspike interval (ISI) lengths in seconds. Plots of spike time  
123 data and ISIs were visually inspected to identify trends, discontinuities and outliers indicating  
124 possible miss-triggering during data acquisition. We tested for serial correlation in interval length

125 using a Wald-Wolfowitz runs test (MATLAB function `runstest`). Records with detectable artefacts  
126 or non-stationarity were removed, leaving 306 (of the initial 330) selected records for further  
127 analysis and modelling.

128 Mean ( $\bar{x}$ ), standard deviation ( $s$ ), coefficient of variation ( $CV = s/\bar{x}$ ) and Pearson's moment of  
129 skewness ( $\gamma = E[(x - \mu)^3]/\sigma^3$ ) were computed for the intervals in each spiketrain, using MATLAB  
130 functions *mean*, *std* and *skewness*. Standard deviations of interval length for the most regular  
131 units in our sample are comparable to the resolution of spike time data acquisition (300us).  
132 Because of this, estimates of CV and skewness for very regular units may be less reliable than  
133 estimates for irregular units. CV is a scale-invariant measure of variability. It is near zero for highly  
134 regular spike trains, near 1 for completely random or Poisson-like activity, and becomes larger  
135 than 1 for clumped or bursting activity. By convention, neurons whose CV falls in the lowest 1/3  
136 of a sample of vestibular afferents are deemed "regular", neurons whose CV falls in the largest  
137 1/3 are deemed "irregular", while neurons with intermediate CV are deemed "intermediate"  
138 (Goldberg & Fernandez, 1971b).

139

#### 140 *Candidate Models*

141 The selected records are observations from a stationary renewal process (no correlation or  
142 trends in interval length over time), which can be modelled as sequences of samples from a fixed-  
143 parameter probability distribution of interval lengths. This is a complete model because the event  
144 times themselves, up to an arbitrary start time, can be recovered from the sequence of intervals  
145 between them. Since interval lengths must be positive and can have arbitrary length, candidate  
146 models must be probability density functions  $f(t; \alpha)$  defined on  $t > 0$  with parameters  $\alpha$ .

147 Previous studies have shown a consistent pattern of ISI distributions in vestibular afferent  
148 spike trains. ISI distributions of the most regular afferents have narrow distributions which are  
149 nearly symmetrical and approximately Gaussian, with standard deviations much smaller than



150 mean interval length ( $\sigma \ll \mu$ ). A Gaussian with  $\sigma \ll \mu > 0$  has essentially no probability mass  
151 below zero and can be treated as a density on  $t > 0$ . ISI distributions of more irregular neurons  
152 tend to be more right-skewed with larger CVs, while interval distributions of the most irregular  
153 neurons resemble exponential distributions, with standard deviation similar to mean interval  
154 length (CV=1). Differences between the most regular and the most irregular neurons are so great  
155 that it has often been suggested that there are distinct populations within the nerve, but there is  
156 a continuum of behaviour between these extremes (Paulin & Hoffman, 2019). Suitable candidate  
157 models therefore are positive-valued, continuously-parameterized probability densities whose  
158 shape transforms continuously between limiting cases resembling Gaussian and Exponential  
159 distributions.

160 Our candidate models fall into three groups. The first group (1.1-1.5 below) were all initially  
161 derived as models of simple physical processes that are at least somewhat analogous to the  
162 canonical “noisy integrate-and-fire” model of a stochastic neuron (ref), and have all been applied  
163 previously to model spiking statistics of neurons, including vestibular semicircular canal afferent  
164 neurons (refs). This group contains the Weibull, Log-normal, Erlang (Integer Gamma), Birnbaum-  
165 Saunders (cumulative damage) and Inverse Gaussian or Wald distributions. They are available  
166 in the MATLAB Statistics Toolbox.

### 167 1.1 Weibull

$$168 \quad f_{WB}(t; \lambda, \kappa) = \begin{cases} \frac{\kappa}{\lambda} \left(\frac{t}{\lambda}\right)^{\kappa-1} e^{-(t/\lambda)^\kappa} & t \geq 0 \\ 0 & t < 0 \end{cases}$$

169 is the distribution of intervals between events when event rate is proportional to a power of the  
170 waiting time since the last event. This is a birth-death model with “aging”. When  $\kappa = 1$  (constant  
171 event rate) the Weibull reduces to an Exponential distribution.

### 172 1.2 Log-normal

$$173 \quad f_{LN}(t; \mu, \sigma) = \frac{1}{t\sigma\sqrt{2\pi}} e^{\left(-\frac{(\ln t - \mu)^2}{2\sigma^2}\right)}$$

174 is the distribution of outcomes of a growth process involving multiplicative interactions among  
175 many small random effects. Multiplicative interactions are additive on a log scale, so the log of  
176 the outcome has a Gaussian or normal distribution because of the Central Limit Theorem.

### 177 1.3 Erlang

$$178 \quad f_{ERL}(t; \kappa, \mu) = \frac{t^{\kappa-1} e^{-t/\mu}}{\mu^{\kappa} (\kappa - 1)!}$$

179 where the *shape parameter*,  $\kappa$ , is a positive integer and the *scale parameter*,  $\mu$ , is a positive real  
180 number, is the distribution of waiting times for  $\kappa$  events in a Poisson process when the average  
181 waiting time is  $\mu$  (such that the average waiting time in the underlying Poisson process is  $\mu/\kappa$ ).  
182 When  $\kappa=1$  the Erlang reduces to an Exponential distribution, the waiting time distribution for  
183 events in a Poisson process. This has been a popular model of neuronal firing variability,  
184 including for vestibular afferent neurons, because of its flexible shape which resembles empirical  
185 interval distributions, and because it has a simple mechanistic interpretation as the waiting time  
186 for the accumulation of quantal events occurring at random times to reach a threshold (Lansky,  
187 Sacerdote, & Zucca, 2016; Shimokawa, Koyama, & Shinomoto, 2010).

### 188 1.4 Birnbaum-Saunders

$$189 \quad f_{BBS}(t; \beta, \gamma) = \frac{\sqrt{t/\beta} + \sqrt{\beta/t}}{2\gamma t \sqrt{2\pi}} e^{\left( -\frac{(\sqrt{t/\beta} - \sqrt{\beta/t})^2}{2\gamma^2} \right)}$$

190 is the distribution of waiting time for the accumulation of events with a Gaussian distribution of  
191 amplitudes occurring at random times to reach a threshold. It is also known as the Cumulative  
192 Damage distribution because of its application to modelling time-to-failure of a system subjected  
193 to impacts with random magnitudes occurring at random times. It is a physically plausible model  
194 of time to threshold for a neuron receiving EPSPs with Gaussian amplitudes, which fits spike train  
195 data from real neurons and biophysically realistic computational neural models (Leiva et al.,  
196 2015).

### 197 1.5 Inverse Gaussian or Wald

198 
$$f_{WLD}(t; \mu, \lambda) = \sqrt{\frac{\lambda}{2\pi t^3}} e^{\left(-\frac{\lambda(t-\mu)^2}{2\mu^2 t}\right)}$$

199 is the distribution of waiting times for Gaussian noise with mean  $1/\mu$  with and variance  $1/\lambda$  to  
 200 integrate to a threshold at 1. It models the first passage time (time to hit a barrier) of a drift-  
 201 diffusion process, i.e. Brownian motion in constant flow (Chhikara & Folks, 1989; Folks &  
 202 Chhikara, 1978).

203 As discussed in the Results section, a second group of candidate models was constructed by  
 204 adding a fixed latency (time offset) parameter to some of the candidates in Group 1. This group  
 205 contains Erlang, Wald and Birnbaum-Saunders distributions, each with an additional time-shift  
 206 parameter,  $\tau$ .

207 **2.1 Offset Erlang**

208 
$$f_{OEL}(t; \kappa, \mu) = \tau + \frac{t^{\kappa-1} e^{-t/\mu}}{\mu^\kappa (\kappa - 1)!}$$

209 **2.2 Offset Wald**

210 
$$f_{OWL}(t; \mu, \lambda) = \tau + \sqrt{\frac{\lambda}{2\pi t^3}} e^{\left(-\frac{\lambda(t-\mu)^2}{2\mu^2 t}\right)}$$

211 **2.3 Offset Birnbaum-Saunders**

212 
$$f_{OBS}(t; \beta, \gamma) = \tau + \frac{\sqrt{t/\beta} + \sqrt{\beta/t}}{2\gamma t \sqrt{2\pi}} e^{\left(-\frac{(\sqrt{t/\beta} - \sqrt{\beta/t})^2}{2\gamma^2}\right)}$$

213 For reasons discussed in Results, a third group of models was constructed by replacing the  
 214 constant offset parameter  $\tau$  in the Group 2 models with an Exponentially-distributed random time  
 215 offset having mean  $\tau$ . In each case this creates a new random variable as the sum of two random  
 216 variables, whose distribution is the convolution of the distributions of the components.

217 **3.1 Exerlang**

218 
$$f_{EXE}(x; \kappa, \mu, \tau) = \frac{1}{\tau(1 - \mu/\tau)^\kappa} e^{-\frac{x}{\tau}} \text{gammainc}\left(x\left(\frac{1}{\mu} - \frac{1}{\tau}\right), \kappa\right)$$

219 This expression for the convolution of an Exponential distribution and an Erlang distribution  
 220 was obtained using *Mathematica* (Wolfram Research, Illinois, USA). `gammaInc` is the MATLAB  
 221 incomplete gamma function, a MATLAB built-in special function. The incomplete gamma function  
 222 is defined slightly differently in MATLAB and *Mathematica*, so the result derived by *Mathematica*  
 223 requires adjustment to obtain the formula given above.

### 224 3.2 Exwald

$$225 \quad f_{EXW}(x; \mu, \lambda, \tau) = \begin{cases} e^{(\lambda/\mu - t/\tau)} ((\operatorname{erfc}(b - c))/d + d(\operatorname{erfc}(b + c)))/(2\tau), & \text{if } a \geq 0 \\ \frac{e^{(\lambda/\mu - t/\tau)} e^{-(b^2 + at)} \operatorname{Re}(w(\sqrt{-at + ib}))}{\tau}, & \text{if } a < 0 \end{cases}$$

226 where  $a = \lambda/(2\mu^2) - 1/\tau$ ,  $b = \sqrt{\lambda/(2t)}$  and  $c = \sqrt{at}$ . `erfc` is the complementary error function,  $w$   
 227 is the Fadeeva scaled complex complementary error function (Abramowitz & Stegun, 1964),  $i =$   
 228  $\sqrt{-1}$  and  $\operatorname{Re}(z)$  is the real part of the complex number  $z$ . This expression was modified from  
 229 formulae given by Schwarz (ref), by setting the barrier distance/threshold level parameter in the  
 230 Wald component of Schwarz's derivation to 1 and scaling the other parameters accordingly. We  
 231 found that this expression can be numerically unstable when  $\lambda \ll \mu$  (diffusion negligible compared  
 232 to drift) or  $\tau \ll \mu$  (Exponential component negligible compared to Wald component). In the former  
 233 case we reduced the Wald drift-diffusion component to a pure drift, approximating the Exwald  
 234 using an Exponential distribution with fixed time offset,  $\mu$ . In the latter case we removed the  
 235 Exponential component, approximating the Exwald using only the Wald component. None of our  
 236 data were fitted by models with parameters in regions of parameter space where these  
 237 approximations were applied, but it was necessary to include these approximations to prevent  
 238 numerical instability when the fitting algorithm explores the parameter space before converging.

### 239 3.3 Exgaussian

$$240 \quad f_{EXG}(x; \mu, \sigma, \tau) = \frac{1}{2\tau} e^{(2(\mu - x) + \sigma^2/\tau)} \operatorname{erfc}\left(\mu - x + \frac{\sigma^2}{\tau}\right)$$

241

242 This expression for the convolution of a Gaussian distribution with mean  $\mu$  and variance  $\sigma^2$   
 243 and an Exponential distribution with mean interval parameter  $\tau$  was derived analytically using  
 244 *Mathematica* (Wolfram Research, Illinois, USA). In this expression,  $\operatorname{erfc}(x) = \frac{2}{\sqrt{\pi}} \int_x^\infty e^{-t^2} dt$ , is the  
 245 complementary error function, a MATLAB built-in Special Function.

246

### 247 *Fitting Criterion*

248 Given an observed probability distribution,  $p(t)$ , and a model  $q(t)$ , the Kullback-Liebler  
 249 divergence from  $q(t)$  to  $p(t)$ , also known as entropy of  $p(t)$  relative to  $q(t)$ , is

$$250 \quad D_{KL}(p||q) = \int p(t) \log_2 \frac{p(t)}{q(t)} dt \quad (1).$$

251 It measures the bits of information lost when  $q(t)$  is used to approximate the empirical distribution,  
 252  $p(t)$ . Given a set of candidate models, minimum  $D_{KL}$  identifies the candidate that minimizes the  
 253 expected information in future observations, given what has been observed (Jaynes & Bretthorst,  
 254 2003; Kullback & Leibler, 1951; Paulin & Hoffman, 2001).

255 Given  $N$  observations  $t_1, t_2, \dots, t_N$ , the empirical distribution can be represented as a  
 256 normalized frequency histogram, with probability  $p_k = n_k/N$  in the  $k$ th bin, where  $n_k$  is the number  
 257 of observations in the  $k$ th bin. Assuming that  $q(t) \approx q_k$  is constant in the  $k$ th bin, the expression  
 258 for  $D_{KL}$  reduces to a sum,

$$259 \quad D_{KL}(p||q) = \int p(t) \log_2 \frac{p(t)}{q(t)} dt = \sum p_k \log_2 \frac{p_k}{q_k} \quad (2).$$

260 If each bin is very narrow and contains at most one observation then  $q(t) = q_k$  and the  
 261 normalized histogram reduces to a particle model, with probability  $p(t_k) = 1/N$  at the observed  
 262 points  $t_k$  and zero elsewhere. In that case the expression for  $D_{KL}$  reduces to

$$263 \quad D_{KL}(p||q) = \int \frac{\delta(t-t_k)}{N} \log_2 \left( \frac{\delta(t-t_k)}{N q(t)} \right) dt = -\frac{1}{N} \sum \log_2(q(t_k)/N) \quad (3).$$

264 Thus

$$265 \quad D_{KL}(p||q) = -\frac{1}{N} \sum \log_2(q(t_k)) + \log_2(N) \quad (4),$$

266 is negative log-likelihood with a logarithmic penalty on sample size.

267        Since the sample size is fixed in each record, fitting a model by minimum  $D_{KL}$  is equivalent to  
268 fitting a model by maximum likelihood for any given neuron. However, across neurons KLD scales  
269 the log-likelihood by the entropy of the empirical distribution, giving a measure of model  
270 performance which is independent of differences in variability of spike time data from different  
271 neurons. For example, regular neurons have narrow ISI distributions with high probability  
272 densities, and generate more spikes during the 20-second recording period because they fire  
273 faster. As a result, the likelihood for any given model is generally larger for more regular neurons,  
274 and using maximum likelihood would bias selection in favour of candidates that are better at fitting  
275 regular neurons.  $D_{KL}$  avoids this problem. Having said that, we found that using maximum  
276 likelihood as a model-selection criterion leads to qualitatively similar results as using  $D_{KL}$ , and  
277 does not change our conclusions.

278

### 279 *Model Fitting*

280        Models were fitted using the MATLAB function `fminsearchbnd` 1.4.0 (D'Errico, 1965), which  
281 implements the Nelder-Mead simplex algorithm (Nelder & Mead, 1965) with constraints. The  
282 constraints were applied to prevent the algorithm from stepping outside the region of parameter  
283 space in which a model is defined (e.g. negative mean interval length), which would produce  
284 meaningless results and/or numerical instability.

### 285 *Analysis of Fitted Models*

286        Candidate models have at most 3 parameters meaning that fitted parameters for each neuron  
287 can be visualized as a point in 3D, and parameters fitted to all records form a cloud in 3D space.  
288 The cloud of points fitted to our data is roughly ellipsoidal in log-log axes. We computed the major  
289 axes of this ellipsoid using the `pca` function in the MATLAB Statistics Toolbox. We computed the  
290 convex hull of parameter estimates in 2D projections (the smallest polygon enclosing all points)

291 using the MATLAB built-in function convhull. We used the first principal component axis to  
 292 generate curves in parameter space showing the predicted value of a parameter given some other  
 293 parameter. For example, to show how a model parameter  $\alpha$  relates to the summary statistic  
 294  $CV = s/\bar{x}$ , we find parameters on the first principal component axis corresponding to a model with  
 295 this CV. Simple closed expressions can be found in all cases, i.e. it is not necessary to use  
 296 numerical optimization/search procedures to compute these curves.

## 297 Results

### 298 Summary Statistics

Figure 1 about here

299

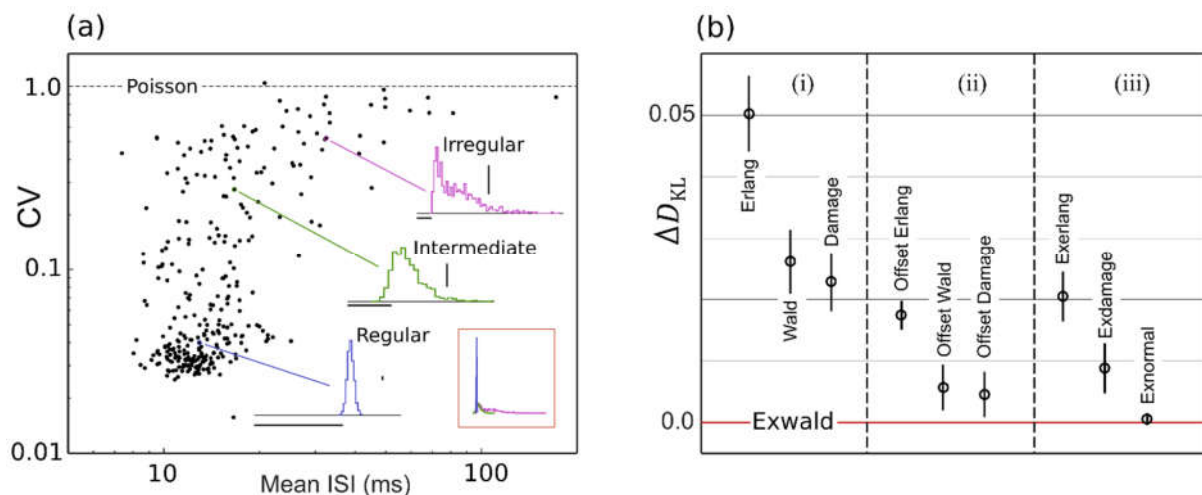

300

301 **Figure 1: (a)** Mean inter-spike interval length vs coefficient of variation (CV) of spontaneous  
 302 activity. Normalized inter-spike interval (ISI) histograms shown for a regular, intermediate and  
 303 an irregular afferent. Aspect ratios are adjusted to show differences in shape between the  
 304 distributions. Horizontal scale bars are 12ms. Vertical scale bars represent relative frequency  
 305 0.05. Inset (lower right) shows the three histograms overlaid with a common aspect ratio. **(b)**  
 306 Average Kullback-Liebler divergence (information loss in bits) for candidate models relative to  
 307 Exwald, the loss-minimizing candidate. Group (i) Random walk models; (ii) Fixed time-offset  
 308 random walk models; (iii) Exponential random offset random walk models. Vertical bars are  
 309 standard errors of means.

310 Figure 1(a) is a scatterplot of conventional ISI summary statistics, mean and coefficient of  
311 variation. It shows the heterogeneity of spontaneous discharge characteristics, and the tendency  
312 for neurons with shorter mean intervals (higher firing rates) to have more regular firing patterns.  
313 The average mean interval is 16.9 ms ( $\pm$  13.0ms) and the average CV is 0.17 ( $\pm$  0.22). This plot  
314 closely resembles scatterplots of mean ISI vs CV in previous reports of vestibular afferent neuron  
315 spiking activity (e.g. Baird et al. (1988) figure 1; Honrubia, Hoffman, Sitko, and Schwartz (1989)  
316 figure 6b; Goldberg (2000) figure 3A; Hullar et al. (2005) figure 1). The scatterplot shows the wide  
317 variation in mean interval length and CV with no indication of distinct groups within the population.

318 ISI histograms for three selected afferents are overlaid on the scatterplot. They closely  
319 resemble ISI distributions previously reported in vestibular afferents in various species (Paulin &  
320 Hoffman, 2019). The inset shows these three distributions plotted on common axes. This  
321 illustrates that while mean and CV reveal substantial diversity in spontaneous behaviour of these  
322 neurons, these descriptive statistics fail to characterise the shapes of ISI distributions and the  
323 large, systematic shape changes across the population. Regular afferents, with faster mean firing  
324 rates tend to have narrow, approximately Gaussian ISI distributions, while irregular, slower-firing  
325 afferents tend to have positively skewed ISI distributions. The most irregular afferents, with CVs  
326 near 1, have ISI distributions that resemble right-shifted or left-censored Exponential distributions.  
327 Exponential interval distributions are characteristic of Poisson processes, for which the average  
328 time between events is fixed but event times are random (Haight, 1967; Landolt & Correia, 1978).  
329 These distributions have the unique property that removing intervals shorter than some specified  
330 duration (left-censoring) is equivalent to right-shifting the distribution by that duration.

331

### 332 *Model Fitting*

333 Initial candidate models were continuous probability distributions defined on positive  
334 intervals: Weibull, Log-normal, Erlang or Integer Gamma, Inverse Gaussian or Wald, and  
335 Birnbaum-Saunders or Cumulative Damage Distribution (See methods). For brevity, we refer to



336 the Birnbaum-Saunders/Cumulative Damage Distribution as the Damage distribution. These  
337 candidates were selected because they possess the requisite property of having Gaussian-like  
338 shapes in some subregion of their parameter space and Exponential-like shapes in some other  
339 subregion. Weibull and Lognormal candidates were quickly eliminated because of large  
340 qualitative discrepancies between the shapes of data and model distributions, evident by  
341 inspection of plots.

342 The remaining candidates, Erlang, Wald and Damage distributions, all seem capable of  
343 generating the shapes of the empirical interval distributions. In addition, they are all waiting time  
344 distributions for random counting or integrating processes to reach a threshold, and can be  
345 interpreted in terms of simple models of physical mechanisms that underlie neuronal spiking. All  
346 have previously been proposed as models of neuronal spiking variability (See Methods). Each of  
347 these distributions has two free parameters.

348 The relative goodness of fit for these three models is shown in the left column of figure 1(b).  
349 The vertical axis in this figure ( $\Delta D_{KL}$ ) is the mean difference between Kullback-Leibler Divergence  
350 from model to data for each model, and the Kullback-Leibler Divergence from model to data for  
351 the model that was ultimately identified as the best model according to the minimum Kullback-  
352 Leibler criterion (See *Methods*). Error bars represent the standard error of mean  $\Delta D_{KL}$ . According  
353 to the minimum  $\Delta D_{KL}$  criterion, the Damage distribution is the best of these candidates, followed  
354 by the Wald and the Erlang.

355 Inspection of plots of best-fitting models overlaid on the empirical interval distributions showed  
356 that in many cases a fitted model deviated systematically from the data, while manual adjustment  
357 of parameters indicated that the model should be capable of fitting the shape of the empirical  
358 distribution much more accurately than it did. We hypothesized that this may be because the  
359 parameters of these models do not affect shape and location independently. A change in either  
360 parameter is generally accompanied by a change in the location (mean) and the shape of the

361 distribution. Because the Kullback-Liebler criterion harshly penalizes models that assign  
362 negligible probability to values that are actually observed, minimum  $\Delta D_{KL}$  favours spreading  
363 probability mass across all observations (i.e. getting the location right) over matching the shape  
364 of the empirical distribution, when it is not possible to do both.

365 We tested this hypothesis by adding a time-offset parameter, allowing each model distribution  
366 to shift arbitrarily along the time axis independently of shape changes. The second panel in  
367 figure 1(b) shows that this additional offset parameter improves the fit of each model. Visual  
368 inspection of plots showed that all three offset models can accurately locate and match the shapes  
369 of the empirical distributions. The performance improvement due to the additional free parameter  
370 is similar for each model, so that their ranking remains the same. The offset Damage model is  
371 the best, followed by the offset Wald and offset Erlang.

372 Introducing a time offset parameter confirmed that there is (at least) a degree of freedom  
373 missing in each of the group 1 statistical models. However, a pure time offset in a model of  
374 neuronal spiking is implausible, not simply because it would imply the existence of a biophysical  
375 clock mechanism capable of producing precisely-timed intervals of different lengths in different  
376 neurons, but because some of the fitted time offset parameters in the group 2 models are  
377 negative. This would imply that in some neurons the clock must trigger the counting/integrating  
378 process that generates a spike at a precise time before the preceding spike. This would violate  
379 causality.

380 The simplest way to extend the group 1 models in a way that adds a degree of freedom in  
381 location is to include a Poisson process in series. A Poisson process has only one parameter,  
382 the mean interval length, and has an Exponential distribution of interval lengths (ref). The effect  
383 of adding an Exponentially-distributed random delay term to each of the Erlang, Damage and  
384 Wald models is shown in the third panel of figure 1(b). This term improves the fit of all three group  
385 1 models. As might be expected, since the time-offset models fit quite precisely and the Poisson  
386 series element must introduce a shape change in addition to a time offset, the Poisson element

387 doesn't improve the fit of the Erlang or Damage models as much as a pure time offset does.  
388 Surprisingly, however, it improves the fit of the Wald model by even more than a pure time offset  
389 does. Evidently a series Poisson process not only provides an additional degree of freedom  
390 allowing the Wald distribution to locate itself over the probability mass of the data, it improves the  
391 ability of the Wald distribution to match the shape of the empirical distribution when it gets there.

392 An Exponential distribution in series with a Wald distribution is called an Exwald distribution  
393 (Schwarz, 2001, 2002). Analogously, we refer to the Exponentially-extended Erlang and Damage  
394 distributions the Exerlang and Exdamage distributions respectively.

395 Wald components of fitted Exwald models consistently resemble narrow Gaussians with  
396 small positive skewness. Positive skew in an empirical distribution is invariably fitted by  
397 increasing the interval parameter of the Poisson component of the model, not by altering the skew  
398 of the Wald component. This raises the possibility that positive skew in empirical ISI distributions  
399 can be explained entirely by the Poisson component of an Exwald model.

400 We tested this possibility by adding an Exponential-Gaussian series model to the candidate  
401 set. This model is labelled Exnormal in the third panel of figure 1(b). It fits almost as well as the  
402 Exwald model on average. The relatively small standard error shows that the Exnormal model fits  
403 the data uniformly almost as well as the Exwald model does.

404

405

*Figure 2 about here*

406

407

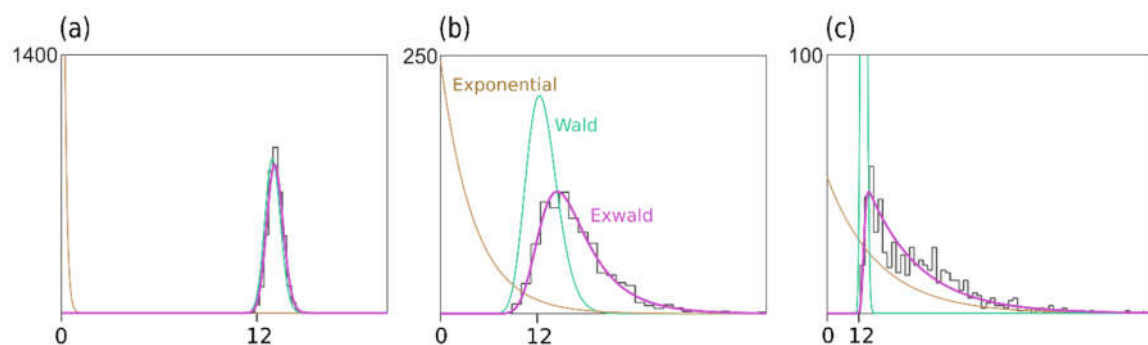

408 **Figure 2:** Fitted Exwald models overlaid on empirical ISI histograms for **(a)** a regular **(b)** an  
409 intermediate and **(c)** an irregular neuron. The Exwald (pink) decomposes into an Exponential  
410 (brown) and a Wald (teal) distribution. Scales are different on each axis because of the large  
411 differences in the shapes of the empirical distributions (See inset, figure 1(a)).

412

413 Figure 2 shows Exwald models fitted to ISI histograms for a regular, an intermediate and an  
414 irregular unit. These are the same example units shown in figure 1(a). Components of the  
415 intermediate model, for which the decomposition is easiest to see, are labelled. All neurons, not  
416 just these three examples, have a refractory period of 10-12ms during which the probability of  
417 spiking is essentially zero. The refractory period appears to be determined by the Wald  
418 component, while the extent of the tail, corresponding to spiking irregularity, appears to be  
419 determined by the Exponential or Poisson component. Shape and location parameters of the  
420 Wald components are similar for all three neurons, while the interval parameter of the Poisson  
421 component is larger for more irregular neurons.

422 *Analysis of the Exwald model.*

423 The Exwald is the distribution of intervals generated by an Inverse Gaussian process in series  
424 with a Poisson process. Each sample from the Exwald is the sum of a sample from the Wald  
425 component and a sample from the Exponential component. It has three parameters:  $\mu$  and  $\lambda$ ,  
426 which are the mean interval and shape parameters of the Wald distribution, and  $\tau$ , which is the  
427 parameter of the Exponential interval distribution of the Poisson process. The parameters are all  
428 positive quantities with dimensions of time, reported here in milliseconds.

429

*Figure 3 about here*

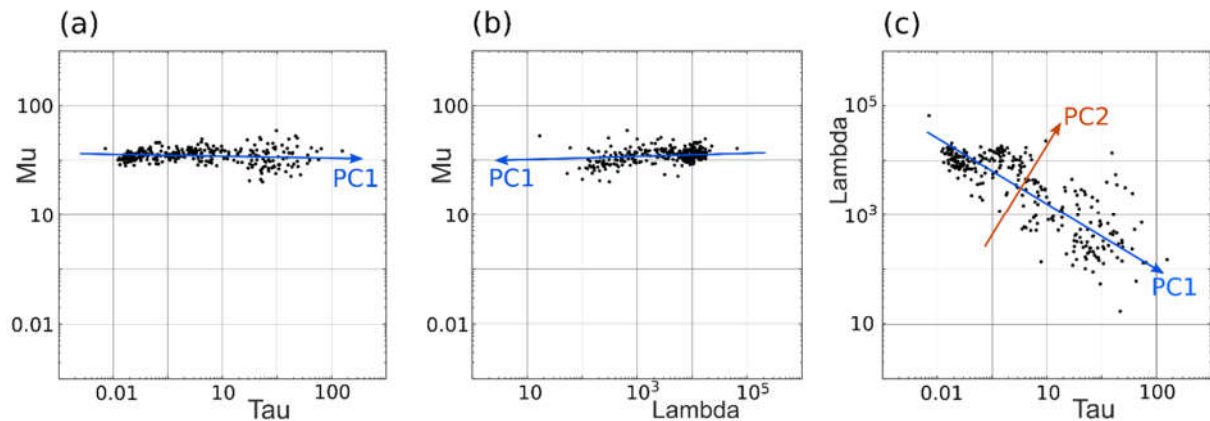

430

431 **Figure 3:** Principal component analysis of Exwald model parameters. (a-c) show the 3D cloud of  
432 fitted parameters projected into each of the coordinate planes on log-log axes. The aspect ratio is  
433 the same on all axes, such that each grid unit represents a tenfold change in magnitude for any of  
434 the parameters. Almost all of the variability is in  $\lambda$  and  $\tau$ , which both vary over several orders of  
435 magnitude, while  $\mu$  is similar, averaging 12.7ms, in all afferents.

436

437 Figure 3 shows the result of principal component analysis (PCA) of Exwald model parameters.

438 The fitted parameters form a flattened, elongated ellipsoidal cloud of points when plotted on log-  
439 log axes in 3D. PCA was used to find the major axes of an ellipsoid fitted to this cloud. Panels  
440 a-c show the parameter cloud and the principal component axes projected into the three  
441 coordinate planes of the parameter space.

442 Panels (a) and (b) show that the first principal component axis (PC1), the major axis of the  
443 parameter distribution, is almost parallel to the  $\tau$  -  $\lambda$  plane, with values of  $\mu$  clustered around the  
444 mean value of 12.7ms.  $\tau$  varies over roughly 4 orders of magnitude while  $\lambda$  varies over roughly 2  
445 orders of magnitude.

446 Panel (c) shows that most of the variation among parameters, and correspondingly most of  
447 the differences between interval distributions, can be explained by only two parameters,  $\tau$  and  $\lambda$ .  
448 PC1 has a slope near -0.5 in the  $\tau$  -  $\lambda$  plane. A slope of -0.5 on log-log axes would indicate an  
449 inverse square relationship between these parameters,  $\lambda \propto 1/\sqrt{\tau}$ .

450

451 *Relationship between Exwald model parameters and conventional summary statistics*

452 Figure 4 about here

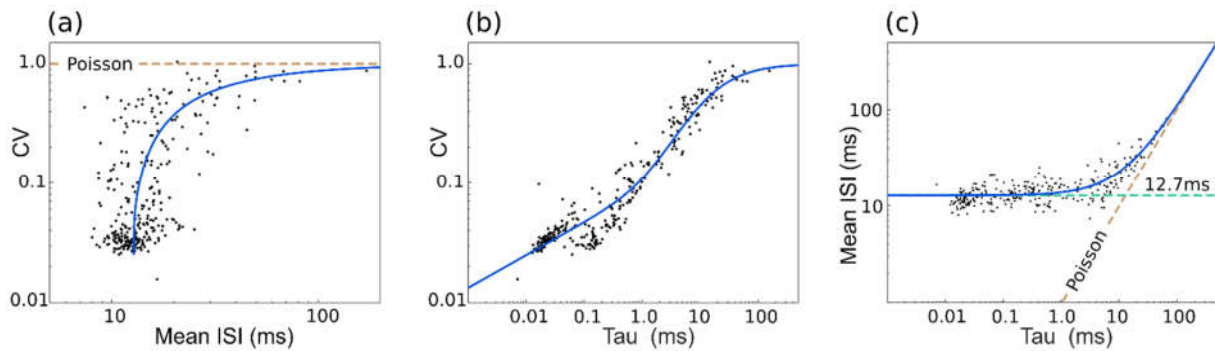

453  
 454 **Figure 4:** Relationship between parameters  $\lambda$  and  $\tau$  of the Exwald model and the conventional  
 455 summary statistics of spontaneous activity, mean inter-spoke interval and CV. **(a)** Scatterplot of mean  
 456 ISI vs CV (c.f. figure 1(a)). Curve shows CV of the Exwald model on PC1 with a given mean ISI. **(b)**  
 457 Scatterplot of  $\tau$  vs CV. Curve shows CV of the Exwald model on PC1 for a given  $\tau$ . **(c)** Scatterplot of  
 458  $\tau$  vs mean ISI. Curve shows the mean ISI of the Exwald model on PC1 for a given  $\tau$ .

459  
 460 Figure 4 shows how the parameters of fitted Exwald models are related to the conventional  
 461 summary statistics that have historically been used to describe the statistical diversity of  
 462 vestibular afferent firing patterns, mean ISI and CV. The curve in figure 4(a) shows the Exwald  
 463 model-predicted CV for parameters on the first principal component axis corresponding to a  
 464 model with the specified mean ISI. It is a projection of PC1 from  $\log(\tau) - \log(\lambda)$  parameter  
 465 space into mean ISI - CV parameter space. It shows that PC1 predicts the nonlinear  
 466 relationship between mean ISI and CV. Similarly, the curves in figure 4(b) and 4(c) show that  
 467  $\tau$  is a good predictor of CV and mean ISI. These plots show that  $\tau$  characterises not only the  
 468 change in mean and variability of ISI distributions over the population, but also the systematic  
 469 change in shape of the distributions. For small values of  $\tau$ , ( $\tau \ll \overline{ISI} \approx 12.7ms$ ), interval length  
 470 is largely determined by the Wald component, while for large values of  $\tau$ , ( $\tau \gg \overline{ISI} \approx 12.7ms$ ),  
 471 interval length is largely determined by the Poisson component. Thus  $\tau$  by itself characterises  
 472 the universally observed pattern in which vestibular afferent neurons show a continuous

473 diversity of statistical behaviour from rapidly firing, regular neurons whose interval distributions  
474 resemble narrow Gaussians to slowly firing, irregular neurons whose interval distributions  
475 resemble right-shifted or (equivalently) left-censored Exponentials.

476 *Distribution of ExWald model shapes in model parameter space.*

477

Figure 5 about here

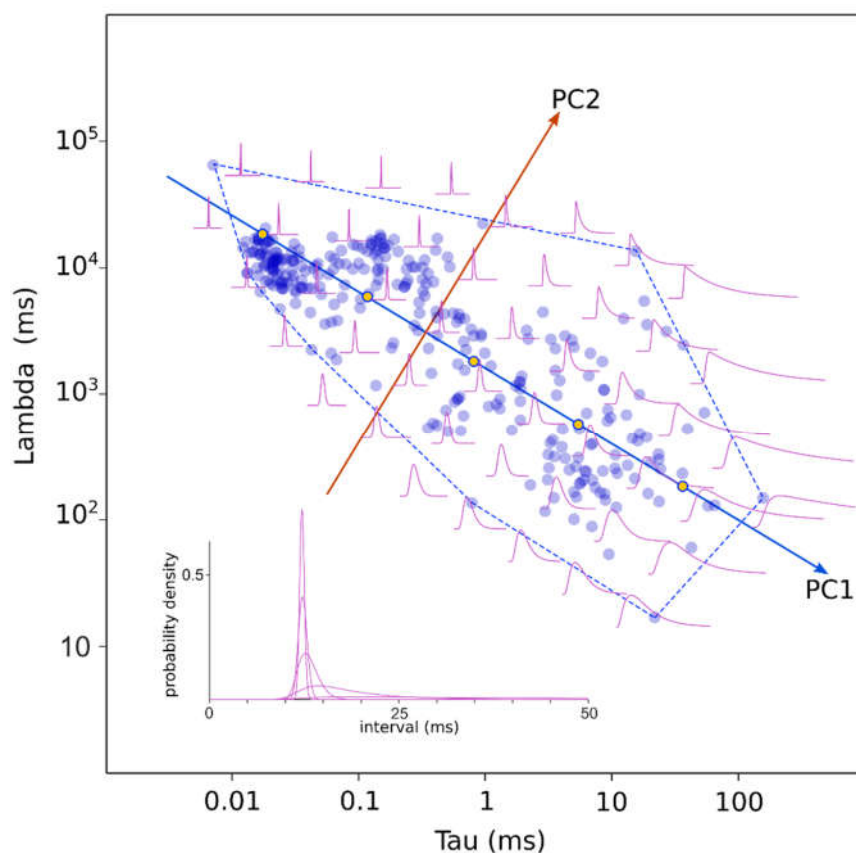

478

479 **Figure 5:** Map of ISI distributions in Exwald parameter space. Scatterplot of fitted parameters in  
480 the  $\tau$ - $\lambda$  plane (blue discs), with principal component axes projected onto the plane. Dashed blue  
481 line is the convex hull of data points. Scaled Exwald models are drawn on a grid. Inset (lower  
482 left) shows the true proportions for five models along the first principal component axis. Their  
483 parameters are indicated by the five markers along PC1.

484 Figure 5 is a map of ISI distributions in  $\log(\tau) - \log(\lambda)$  space. Parameter values fitted to data  
485 (the same as in figure 3(c)) are plotted here as blue discs. The first two principal component axes

486 are shown. The dashed line is the convex hull, the smallest polygon enclosing all of the fitted  
487 parameter points. Shapes of Exwald model interval distributions are drawn on a grid in PC1-PC2  
488 coordinates, aligned with the  $\log(\tau) - \log(\lambda)$  axes. For each distribution,  $t=0$  is plotted at the grid  
489 point and the time scales are all the same. The vertical (probability density) axes are scaled so  
490 that all distributions have the same height on the plot. In reality the distributions for the most  
491 regular neurons (upper left of the map) are very much taller than the distributions for the most  
492 irregular neurons (lower right). The inset (lower left) shows the true shapes of five distributions  
493 spaced along PC1.

494 This figure indicates that the first principal component measures ISI variability, which is  
495 strongly predictable by  $\tau$  (c.f. figure 4(b)), The second principal component measures variability  
496 of the refractory period, which is strongly predicted by  $\lambda$ , as evidenced by the increasingly steep  
497 onset of spiking probability after a refractory period, in the PC2 direction.

498 According to the principal components analysis, 91.7% of parameter variance is explained by  
499 PC1, 7.6% is explained by PC2 and 0.7% by PC3. This suggests that differences in the statistical  
500 properties of afferents are mostly controlled by changes in a single degree of freedom in the  
501 underlying physical process(es), and are almost entirely, if not entirely, controlled by changes in  
502 at most two degrees of freedom.

### 503 *Neural Computation for Bayesian Inference Given Exwald Data*

504 The form of the Exwald model suggests an elegant natural mechanism that neurons could  
505 employ in inferring the posterior density of stimulus parameters given samples from a point  
506 process with Exwald interval statistics. Sequential or dynamical Bayesian inference entails  
507 computing the likelihood function for the parameter(s) given the most recent observation,  
508 multiplying this by the probability inferred from previous observations (the prior probability) at each



509 parameter value, then (re)normalizing to obtain a function that integrates to 1 over the parameter  
510 space (Doucet et al., 2001).

511 The most recent observation for a stationary renewal process at any time, the latest available  
512 information, is the elapsed time since the most recent event. Many models have been proposed  
513 to explain multiplicative gain or sensitivity adjustments and normalization of activity levels across  
514 neural populations (Bastian, 1986; Beck, Latham, & Pouget, 2011; Capaday, 2002; Carandini &  
515 Heeger, 2012; Eliasmith & Martens, 2011; Louie, Khaw, & Glimcher, 2013; Mejias, Payeur, Selin,  
516 Maler, & Longtin, 2014; Nelson, 1994; Olsen, Bhandawat, & Wilson, 2010; Silver, 2010), and we  
517 will not consider possible mechanisms for these operations in the vestibular system beyond noting  
518 that it is widely accepted that neurons are capable of such computations. The key additional  
519 computational capability that neurons would require to implement dynamical Bayesian inference  
520 in the vestibular system is the ability to compute parameter likelihoods given the elapsed time  
521 since the most recent event.

522 The likelihood function for the parameters  $\mu$ ,  $\lambda$ , and  $\tau$  of an Exwald process given elapsed  
523 time  $t$  since the most recent event is, by definition, the probability of observing an interval of  
524 length  $t$  if the parameters are  $\mu$ ,  $\lambda$ , and  $\tau$ . The Exwald distribution is a convolution of an Inverse  
525 Gaussian and an Exponential,

$$526 \quad L(\mu, \lambda, \tau; t) = \gamma \int_{-\infty}^{\infty} IG(t - s; \mu, \lambda) e^{-s/\tau} ds,$$

527 where  $\gamma$  is an arbitrary constant (because a scaled likelihood function is a likelihood function).  
528 For Bayesian inference given spike train data from a vestibular afferent neuron, (some) central  
529 neurons must be able to compute  $L(\mu, \lambda, \tau; t)$  given  $t > 0$ .

530 The electrical response of a neuronal membrane compartment to a transient depolarizing  
531 current input with waveform  $I(t; \mu, \lambda)$  is the convolution of the exponential impulse response of  
532 the membrane compartment with the input waveform,

$$533 \quad V(\mu, \lambda, \tau; t) = \gamma \int_{-\infty}^{\infty} I(t - s; \mu, \lambda) e^{-s/\tau} ds,$$

534 where  $V(t)$  is voltage referenced to resting membrane potential,  $\tau$  is the electrical time constant  
535 of the membrane compartment, and  $\gamma$  is an arbitrary constant (because current and voltage can  
536 be measured in arbitrary units) (Bower & Beeman, 1998; Koch, 1999). Thus a neuronal  
537 compartment with membrane time constant  $\tau_0$  and a synapse whose EPSP shape is controlled  
538 by two parameters,  $\mu$  and  $\lambda$ , with values  $\mu_0$  and  $\lambda_0$ , is a natural analog computer that  
539 instantaneously computes the likelihood for the parameters  $(\mu, \lambda, \tau)$  at the point  $(\mu_0, \lambda_0, \tau_0)$ , at  
540 time  $t$  after the preceding synaptic input. By postulating that EPSP waveforms  $I(t)$  mimic the  
541 shape of Inverse Gaussian distributions  $IG(t)$  - which, on the face of it, they do - neuronal  
542 compartments could compute parameter likelihoods from point process data with Exwald  
543 interval distributions.

544 It may be non-trivial to arrange neurons capable of these basic operations (amplification,  
545 normalization and evaluating likelihoods) into circuitry capable of inferring the Bayesian  
546 posterior density given vestibular afferent neuron spike trains, and will not attempt here to show  
547 how it may be done. However, the remarkable isomorphism between equation 1, representing  
548 an abstract probability computation which is fundamental for dynamical Bayesian inference, and  
549 equation 2, representing a physical model of the electrical behaviour of a neuron, is worth  
550 mentioning, because it shows that mechanisms capable of implementing all of the mathematical  
551 operations required for dynamical Bayesian inference occur naturally in neurons, and would be  
552 available to be co-opted by evolution if there was selection pressure on nervous systems to be  
553 Bayesian.

## 554 Discussion

555 The diversity of vestibular afferent neuron firing behaviour has been characterised in the past  
556 using the coefficient of variation (CV) of inter-spike intervals as a signature that predicts other  
557 statistical, dynamical and anatomical characteristics of these neurons (Goldberg, 2000; Goldberg  
558 et al., 2012). Using an information-theoretic model selection procedure, we found that

559 spontaneous activity patterns of chinchilla semicircular canal afferent neurons can be accurately  
560 modelled using a simple, three-parameter model. The first principal component axis of fitted  
561 parameters lies almost parallel to the  $\tau - \lambda$  plane and in log-transformed axes has slope close to  
562  $-\frac{1}{2}$  in that plane, indicating that  $\tau$  and  $\lambda$  are related by a power law that is approximately an inverse  
563 square law,  $\lambda \propto 1/\sqrt{\tau}$ . Because there is a unique point on the first principal component axis for  
564 any given  $\tau$ , more than 90% of parameter variation among neurons can be explained by  $\tau$  alone.  
565 Adding a second parameter,  $\lambda$ , accounts for more than 99% of parameter variation. The third  
566 parameter,  $\mu$ , contributes less than 1% of parameter variation and is essentially constant for all  
567 neurons.

568 The Exwald parameters,  $\mu, \lambda$  and  $\tau$ , can be used to compute the conventional summary  
569 statistics of spontaneous activity, mean ISI, CV and skewness, if needed. Because CV is a noisy  
570 invertible function of  $\tau$  (figure 4(b)),  $\tau$  by itself should be a good predictor of statistical, dynamical  
571 and anatomical properties of vestibular afferent neurons. The Exwald parameters appear to  
572 characterise the diversity of spontaneous activity at least as well as the conventional summary  
573 statistics do, but in addition they accurately describe the interval distributions themselves.

574 Because event times can be recovered from the intervals between them, the Exwald model  
575 provides a complete stochastic process model of spontaneous activity in these neurons. It can  
576 be regarded as a descriptive or phenomenological model whose parameters supersede the  
577 conventional summary statistics. Its efficacy as a descriptive model raises the question of  
578 whether it is, or may lead to, an explanatory model of vestibular afferent neuron behaviour.  
579 Because CV is computable from parameters of an Exwald model and CV is correlated with  
580 dynamical response parameters of vestibular afferent neurons, the Exwald model may  
581 characterise more than just spontaneous activity patterns of these neurons.

582 Mechanosensory hair cells and related acousticolateralis receptor cells can transduce signals  
583 with power levels smaller than thermal noise power in the transduction mechanisms (Denk &

584 Webb, 1988; Denk, Webb, & Hudspeth, 1986; Markin & Hudspeth, 1995), and such signals are  
585 perceptible (Bialek, 1987; Devries, 1948; Torre, Ashmore, Lamb, & Menini, 1995). This implies  
586 that stochasticity in spontaneous activity is driven by thermal noise in transduction, synaptic and  
587 spike-generating mechanisms. Spontaneous firing is, however, a laboratory artefact, imposed  
588 by clamping an animal's head so that it cannot move. Under natural conditions the head is always  
589 moving, and the ecological function of "spontaneous" firing is to provide high acuity sense data  
590 for postural stability, compensatory reflexes and acuity of other senses when the animal is not  
591 actively moving its head. A completely motionless head is not natural, but it is the limiting case  
592 of an ecologically important state. Generalized fluctuation-dissipation theorems then imply that  
593 the response to intrinsic thermal noise characterises the system's dynamical responses to small  
594 stimuli (Dinis, Martin, Barral, Prost, & Joanny, 2012; Marconi, Puglisi, Rondoni, & Vulpiani, 2008;  
595 Prost, Joanny, & Parrondo, 2009). It follows that an Exwald model fitted to the spontaneous  
596 interval distribution of a neuron should be able to predict the neuron's dynamical responses, at  
597 least during small head movements.

598 When the average firing rate of a vestibular afferent neuron is held at a constant level above  
599 its spontaneous rate by applying prolonged unidirectional acceleration, the variability of interval  
600 length as measured by CV also increases (Fernandez & Goldberg, 1976; Goldberg, 2000;  
601 Goldberg & Fernandez, 1971a). The change in CV as a function of mean interval is approximately  
602 a power law  $CV(\overline{ISI}) = a\overline{ISI}^b$  with exponent  $b = 1/2$  (Goldberg & Fernandez, 1980; Paulin &  
603 Hoffman, 2019). Since CV is the square root of variance divided by the mean, this relationship  
604 implies that the variance of interval length scales with the cube of mean interval length,  $\sigma^2 \propto \mu^3$ .  
605 This scaling law is a unique signature of an Inverse Gaussian or Wald distribution (Chhikara &  
606 Folks, 1989). Thus a simple auxiliary assumption - that vestibular stimulation alters the parameter  
607  $\mu$  - can extend the Exwald model to explain the statistics vestibular afferent neuron responses  
608 under constant stimulation.

609 Instantaneous firing rates of semicircular canal afferents responding to broad-band,  
610 naturalistic head motion exhibit a simple, fractional order dynamical relationship to head angular  
611 velocity, of the form  $r - r_0 = \frac{d^q \omega}{dt^q}$ , where  $0 < q < 1$  (Paulin & Hoffman, 1999; Paulin & Hoffman,  
612 2019). This suggests that the Exwald model of spontaneous activity may be extended to a  
613 stochastic dynamical model by making its parameters depend on head angular velocity in this  
614 manner. Further investigation and testing is required in order to determine if and how the Exwald  
615 model might be extended to describe the dynamics and statistics of spiking beyond the quasi-  
616 static state of small head movements.

617 The Inverse Gaussian or Wald is the distribution of time taken for Gaussian white noise with  
618 mean  $r = \alpha/\mu$  and power  $\sigma^2 = \alpha/\lambda^2$  to integrate to a threshold at  $\alpha$  (ref). We set  $\alpha = 1$  without  
619 loss of generality (equivalent to choosing units in which  $\alpha = 1$ ). A very simple neural model can  
620 explain why the distribution of interval lengths for a stochastic spiking neuron might contain a  
621 Wald distribution: If  $r$  is the mean rate of depolarization, then intervals generated by an integrate-  
622 and-fire neuron which resets to zero membrane potential after each spike will have a Wald  
623 distribution. An Exwald is the distribution of the sum of samples from a Wald and an Exponential  
624 distribution, hinting that vestibular afferent neurons spikes may be generated by a Poisson  
625 process in series with a noisy integrate-and-fire process. Poisson distributions occur as limiting  
626 cases in many stochastic process models, analogous to the way that Gaussian distributions occur  
627 as limiting cases when independent observations are combined (Arratia, Goldstein, & Gordon,  
628 1990; Chen, 1975). Poisson data can be generated simply by threshold triggering in a stationary  
629 noise process (Basano & Ottonello, 1975). For example, spontaneous thermal-noise driven  
630 opening times of sensory receptor channels are Poisson-distributed, with exponential interval  
631 distributions (Sigg, 2014; Smith, 2002).

632 The existence of very simple mechanisms that can produce events with Inverse Gaussian and  
633 Exponential interval distributions then suggests a very simple possible explanation for the

634 superficial statistical complexity of vestibular afferent neuron behaviour. Exwald distributions  
635 could have evolved because combining processes with Inverse Gaussian and Exponential  
636 interval statistics in series is a simple, feasible way to translate microscopic, low-power stochastic  
637 molecular transduction events into high-power electrochemical events carrying the same  
638 information but which can be transmitted rapidly over macroscopic distances to the brain (Sterling  
639 & Laughlin, 2015). In other words, evolution found a simple way to transmit information from  
640 mechanoreceptors to the brain using existing mechanisms, and this happened to produce spike  
641 trains with Exwald interval distributions.

642 However, the molecular mechanisms that mediate signal transmission from transduction in  
643 receptor hair cells to spiking in vestibular afferent neurons are prodigiously complex (Glowatzki,  
644 Grant, & Fuchs, 2008; Hudspeth, 1983; McPherson, 2018; Vollrath, Kwan, & Corey, 2007).  
645 Natural selection appears to have put a great deal of effort into constructing intricate mechanisms  
646 that transduce tiny deflections of hair cell cilia into electrical signals, and amplify the transduced  
647 signal into spiking events in afferent neurons. The pathway from transduction to spiking is  
648 evidently not a simple juxtaposition of two simple molecular mechanisms. On the contrary, it  
649 comprises a byzantine conglomeration of structures that collectively behave *as if* this were the  
650 case. That the net behaviour of such complex machinery can be accurately modelled in such a  
651 mathematically elegant way suggests that the machinery must have been selected to produce  
652 this behaviour. That is, there must be some selective advantage in transmitting vestibular  
653 information to the brain using spike trains with Exwald-distributed intervals, or some similar  
654 distribution.

655 As discussed in the introduction, there are several ubiquitous characteristics of vestibular  
656 afferent neuron behaviour requiring explanation. As noted above, noisiness or stochasticity in  
657 afferent spike trains can be explained by specialization to detect and transmit small signals.  
658 Spontaneous activity in afferents is driven by thermal noise in molecular mechanisms, which are  
659 amplified to produce spike train stochasticity because the peripheral vestibular system has

660 evolved to gather information about signals that are small compared to thermal noise, and amplify  
661 them into spike trains (Denk & Webb, 1989, 1992; Denk et al., 1986; Torre et al., 1995; van Netten  
662 & Kros, 2000).

663 The distribution of low-dimensional signals across thousands of afferents can be explained by  
664 selection for energy efficiency. The energy cost of spiking neurons, which is dominated by the  
665 cost of spiking (Aiello & Bach-y-Rita, 2000; Cohen, 2005; Niven, 2016; Yu & Yu, 2017), is a major  
666 constraint on nervous system evolution (Hasenstaub, Otte, Callaway, & Sejnowski, 2010;  
667 Laughlin, 2001; Lewis, Gilmour, Moorhead, Perry, & Markham, 2014; Niven & Laughlin, 2008;  
668 Sterling & Laughlin, 2015). Because spiking neurons are so energetically expensive, there is  
669 strong selection pressure for neurons to maximize channel capacity per unit energy cost. Sterling  
670 and Laughlin (2015) suggest that the performance of neural communication and computation  
671 should be measured in bits per second per Watt, or bits per Joule, rather than channel capacity,  
672 or bits per second, which has been the conventional measure of performance in communication  
673 and information processing systems. Using bits per Joule as a proxy for the evolutionary fitness  
674 of nervous systems can explain many features of nervous system structure and function (Sterling  
675 & Laughlin, 2015).

676 Spike trains become prohibitively expensive at high average firing rates because when an  
677 action potential occurs within a few milliseconds of another, overlapping sodium and potassium  
678 ion fluxes consume energy without changing the membrane potential. Efficient neural  
679 computation and communication requires average firing rates below about  $100\text{s}^{-1}$  (Goldberg,  
680 Sripati, & Andreou, 2003; Hasenstaub et al., 2010; Levy & Baxter, 1996). As illustrated in figure  
681 2, semicircular canal afferents have refractory periods in the order of 10ms, and mean interval  
682 duration around 13ms. The mean interspike interval for all neurons in our sample is 12.7ms,  
683 corresponding to a rate of 78.7 spikes per second.

684 The functional bandwidth of transduction in vestibular hair cells and signal transmission in the  
685 vestibular nerve exceeds 1KHz (Bechstedt & Howard, 2007; Eatock, 2018; Hudspeth & Markin,

686 1994; Roberts, Howard, & Hudspeth, 1988). Such high bandwidth vestibular sense data must be  
687 ecologically important because otherwise evolution would not have continued to invest in  
688 molecular biophysical machinery capable of transducing it and delivering it to the brain. The  
689 prohibitive energy cost of firing at high rates provides strong selection pressure for mammals to  
690 distribute high bandwidth sensory signals over many neurons each firing at average rates in the  
691 order of tens of spikes per second (Balasubramanian, 2015; Sengupta & Stemmler, 2014).

692 The Exwald is the distribution of the sum of samples from Exponential and Wald distributions,  
693 but because the shape of an Exponential beyond any point is the same as the shape of the whole  
694 distribution, the Exwald is also the shape of an Exponential distribution left-censored by a Wald  
695 distribution. Thus the Wald component of an Exwald distribution can be interpreted as the  
696 distribution of refractory periods in a refractory-censored Poisson process. Refractory censoring  
697 with a mean interval around 12.5ms keeps average firing rate below  $80\text{s}^{-1}$ . Censoring with  
698 random rather than fixed refractory periods means that the censored samples are independent  
699 random samples from the uncensored distribution. Many such channels can transmit the same  
700 information in parallel at the same rate as a single neuron firing fast enough (i.e. sampling from  
701 the same distribution fast enough) to transmit the signal at high bandwidth, without incurring the  
702 catastrophic energy cost which that would entail. Thus the functional organization of the vestibular  
703 nerve is consistent with the proposal of Sterling and Laughlin (2015) that sensory neurons evolved  
704 to transmit information about molecular-scale transduction events at the mesoscale of whole  
705 animals, severely constrained by the energy costs of doing this using molecular mechanisms.

706 The heterogeneity of afferent neuron firing behaviour, i.e. the fact that they sample from  
707 Exwald distributions with different parameters, can be explained by the fact that distributed  
708 signalling on parallel channels can be more efficient if different channels have different  
709 characteristics (Barlow, 1961). As a specific example, it's easier to detect larger signals in  
710 noise, and energy can be saved by using specialized channels with different sensitivities (Doi &  
711 Lewicki, 2014; van Hateren, 1992). This principle has been used to explain the statistical and



712 dynamic diversity of retinal ganglion cells, and might also explain statistical and dynamical  
713 diversity among vestibular afferent neurons. The specific pattern of heterogeneity would  
714 depend on the statistics of natural head motion, which have not been well characterized in any  
715 species. Further investigation is required to explore and test whether the distribution of  
716 parameters illustrated in figure 5 reflects an optimally efficient way to distribute information  
717 about natural vestibular sense data across parallel channels, when individual channels are point  
718 processes with Exwald interval statistics.

719 Under general assumptions about spiking energetics, spike trains with Generalized Inverse  
720 Gaussian interval distributions maximize the information capacity of point-process channels  
721 subject to an energy constraint (Berger, Levy, & Jie, 2011; Xing, Berger, Sungkar, & Levy,  
722 2015). Wald distributions are members of this class, suggesting that selection for energy  
723 efficiency may at least in part explain not only the massive parallelism and heterogeneity of  
724 information transmission in the vestibular nerve, but also the statistical distribution of intervals in  
725 individual neurons.

726 Natural selection does not act on components independently, but on the contribution of  
727 components to fitness of the organism. Thus the cost of information transmission in a sensory  
728 nerve must be weighed against the cost of processing that information in the brain. Other  
729 things being equal, we might expect brains to have evolved to be Bayesian (Levy, 2006),  
730 because Bayesian inference is 100% efficient in extracting information about parameters from  
731 data (Zellner, 1988) and is necessary for statistically optimal decision-making and optimal  
732 stochastic control (Berger, 1985). However, as critics of the “Bayesian brain” hypothesis have  
733 asked, at what cost? The mathematical efficiency of Bayesian inference does not account for  
734 the energy costs of Bayesian computation. Current Bayesian methods are computationally  
735 intensive, and indeed Bayesian inference has only recently become feasible beyond a few  
736 classical special cases as a result of massive reductions in the cost of computing (Kruschke,  
737 2015). This suggests that even if were possible for neurons to extract information from sense

738 data by Bayesian inference, the very high energy cost of neural computation should have  
739 weighed heavily against it, and should have favoured computationally cheaper heuristic rules  
740 and approximations instead (Bowers & Davis, 2012; Domurat, Kowalczyk, Idzikowska,  
741 Borzymowska, & Nowak-Przygodzka, 2015; Gigerenzer & Gaissmaier, 2011). Perhaps animals  
742 ought to behave as if they are Bayesians, as they do (McNamara, Green, & Olsson, 2006;  
743 Valone, 2006), but it is far from obvious that they should, could or actually do this by being  
744 Bayesian.

745 We found that Wald distributions by themselves are poor models, but convolution of Wald  
746 distributions with Exponential distributions produces Exwald distributions, which are excellent  
747 models of semicircular canal afferent neuron behaviour. The Exwald has an interesting property  
748 that may be relevant to Bayesian neural computation. A neuronal membrane compartment can  
749 be modelled electrically as a resistor parallel to a capacitor, whose response to impulsive  
750 current injection is an exponential decay function. Its response to an arbitrary current waveform  
751 is the convolution of that waveform with an exponential. Therefore, as we showed above, a  
752 membrane compartment containing a single synapse is a natural computer which can compute  
753 the likelihood of particular parameters given input pulses with Wald-like waveforms and Exwald-  
754 distributed intervals, instantaneously at all times. This property depends on having a series  
755 Poisson component in the data-generating process, and on synapses that can be  
756 parameterized so that the shape of EPSP matches the shape of the interval distribution of the  
757 other component. It is not necessary for the other component to have a Wald distribution. Thus  
758 while Bayesian computations have a reputation for being computationally intensive, slow and  
759 energy-hungry, there may be a simple, fast, efficient way for neurons to compute posterior  
760 densities of the parameters of a point process with Exwald interval distributions, given samples  
761 from the process. We speculate that Exwald distributions may have been selected for  
762 information transmission by vestibular afferent neurons because this optimizes energy

763 efficiency, accounting for the total cost of data transmission and Bayesian inference for optimal  
764 dynamical head-state estimation in the brain.

765 Our goal was to construct a generative model of vestibular sense data, providing a foundation  
766 for developing testable models of neural computation for Bayesian inference in the vestibular  
767 system. We found that afferent spike trains are samples from stationary renewal processes with  
768 Exwald interval distributions. This model provides tantalizing hints about possible mechanisms of  
769 neural computation for Bayesian inference, and pointers for further research.

770

## 771 **References**

772

773

- 774 Abramowitz, M., & Stegun, I. A. (1964). *Handbook of mathematical functions with formulas, graphs, and*  
775 *mathematical tables*. Washington,: U.S. Govt. Print. Off.
- 776 Aiello, G. L., & Bach-y-Rita, P. (2000). The cost of an action potential. *Journal of Neuroscience Methods*,  
777 *103*(2), 145-149. doi:10.1016/s0165-0270(00)00308-3
- 778 Arratia, R., Goldstein, L., & Gordon, L. (1990). Poisson approximation and the Chen-Stein method.  
779 *Statistical Science*, *5*(4), 403-434.
- 780 Baird, R. A., Desmadryl, G., Fernandez, C., & Goldberg, J. M. (1988). THE VESTIBULAR NERVE OF THE  
781 CHINCHILLA .2. RELATION BETWEEN AFFERENT RESPONSE PROPERTIES AND PERIPHERAL  
782 INNERVATION PATTERNS IN THE SEMICIRCULAR CANALS. *Journal of Neurophysiology*, *60*(1),  
783 182-203.
- 784 Balasubramanian, V. (2015). Heterogeneity and Efficiency in the Brain. *Proceedings of the IEEE*, *103*(8),  
785 1346-1358. doi:10.1109/jproc.2015.2447016
- 786 Barlow, H. B. (1961). Possible principles underlying the transformations of sensory messages. In W.  
787 Rosenblith (Ed.), *Sensory Communication* (pp. 330-360). Cambridge, MA: M.I.T. Press.
- 788 Basano, L., & Ottonello, P. (1975). Thermal Noise as a Source of Poisson Distributions. *American Journal*  
789 *of Physics*, *43*(5), 452-453. doi:10.1119/1.9825
- 790 Bastian, J. (1986). GAIN-CONTROL IN THE ELECTROSENSORY SYSTEM MEDIATED BY DESCENDING INPUTS  
791 TO THE ELECTROSENSORY LATERAL LINE LOBE. *Journal of Neuroscience*, *6*(2), 553-562.
- 792 Bechstedt, S., & Howard, J. (2007). Models of hair cell mechanotransduction. In O. P. Hamill (Ed.),  
793 *Mechanosensitive Ion Channels, Pt B* (Vol. 59, pp. 399-424). San Diego: Elsevier Academic Press  
794 Inc.
- 795 Beck, J. M., Latham, P. E., & Pouget, A. (2011). Marginalization in Neural Circuits with Divisive  
796 Normalization. *Journal of Neuroscience*, *31*(43), 15310-15319. doi:10.1523/jneurosci.1706-  
797 11.2011
- 798 Berger, J. O. (1985). *Statistical decision theory and Bayesian Analysis* (2 ed.). New York: Springer-Verlag.
- 799 Berger, T., Levy, W. B., & Jie, X. (2011, 28-30 Sept. 2011). *Energy efficient neurons with generalized*  
800 *inverse Gaussian interspike interval durations*. Paper presented at the Communication, Control,  
801 and Computing (Allerton), 2011 49th Annual Allerton Conference on.

- 802 Bialek, W. (1987). Physical Limit to Sensation and Perception. *Annual Review of Biophysics and*  
803 *Biophysical Chemistry*, 16, 455-478.
- 804 Borah, J., Young, L. R., & Curry, R. E. (1988). Optimal Estimator Model for Human Spatial Orientation.  
805 *Annals of the New York Academy of Sciences*, 545(1), 51-73. doi:10.1111/j.1749-  
806 6632.1988.tb19555.x
- 807 Bower, J. M., & Beeman, D. (1998). *The book of GENESIS : exploring realistic neural models with the*  
808 *GENERAL NEURAL SIMULATION SYSTEM* (2nd ed.). Santa Clara, Calif.: TELOS.
- 809 Bowers, J. S., & Davis, C. J. (2012). Bayesian Just-So Stories in Psychology and Neuroscience.  
810 *Psychological Bulletin*, 138(3), 389-414. doi:10.1037/a0026450
- 811 Capaday, C. (2002). A re-examination of the possibility of controlling the firing rate gain of neurons by  
812 balancing excitatory and inhibitory conductances. *Experimental Brain Research*, 143(1), 67-77.  
813 doi:10.1007/s00221-001-0970-z
- 814 Carandini, M., & Heeger, D. J. (2012). Normalization as a canonical neural computation. *Nature Reviews*  
815 *Neuroscience*, 13(1), 51-62. doi:10.1038/nrn3136
- 816 Chen, L. H. Y. (1975). Poisson Approximation for Dependent Trials. 534-545.  
817 doi:10.1214/aop/1176996359
- 818 Chhikara, R. S., & Folks, L. (1989). *The inverse Gaussian distribution : theory, methodology, and*  
819 *applications*. New York: M. Dekker.
- 820 Cohen, N. (2005). From ionics to energetics in the nervous system. *Solid State Ionics*, 176(19-22), 1661-  
821 1666. doi:<http://dx.doi.org/10.1016/j.ssi.2005.04.014>
- 822 D'Errico, J. (1965). fminsearchbnd. Matlab Central File Exchange.
- 823 de Xivry, J. J. O., Coppe, S., Blohm, G., & Lefevre, P. (2013). Kalman Filtering Naturally Accounts for  
824 Visually Guided and Predictive Smooth Pursuit Dynamics. *Journal of Neuroscience*, 33(44),  
825 17301-17313. doi:10.1523/jneurosci.2321-13.2013
- 826 Denk, W., & Webb, W. W. (1988). TRANSDUCTION SENSITIVITY APPROACHING THE LIMIT GIVEN BY THE  
827 SPONTANEOUS BROWNIAN-MOTION OF THE HAIR BUNDLE. *Biophysical Journal*, 53(2), A427-  
828 A427.
- 829 Denk, W., & Webb, W. W. (1989). THERMAL-NOISE-LIMITED TRANSDUCTION OBSERVED IN  
830 MECHANOSENSORY RECEPTORS OF THE INNER-EAR. *Physical Review Letters*, 63(2), 207-210.  
831 doi:10.1103/PhysRevLett.63.207
- 832 Denk, W., & Webb, W. W. (1992). FORWARD AND REVERSE TRANSDUCTION AT THE LIMIT OF  
833 SENSITIVITY STUDIED BY CORRELATING ELECTRICAL AND MECHANICAL FLUCTUATIONS IN FROG  
834 SACCULAR HAIR-CELLS. *Hearing Research*, 60(1), 89-102. doi:10.1016/0378-5955(92)90062-r
- 835 Denk, W., Webb, W. W., & Hudspeth, A. J. (1986). OPTICAL MEASUREMENT OF THE BROWNIAN-  
836 MOTION SPECTRUM OF HAIRBUNDLES IN THE TRANSDUCING HAIR-CELLS OF THE FROG  
837 AUDITORY-SYSTEM. *Biophysical Journal*, 49(2), A21-A21.
- 838 Devries, H. (1948). MINIMUM PERCEPTIBLE ENERGY AND BROWNIAN MOTION IN SENSORY PROCESSES.  
839 *Nature*, 161(4080), 63-63. doi:10.1038/161063b0
- 840 Dinis, L., Martin, P., Barral, J., Prost, J., & Joanny, J. F. (2012). Fluctuation-Response Theorem for the  
841 Active Noisy Oscillator of the Hair-Cell Bundle. *Physical Review Letters*, 109(16).  
842 doi:10.1103/PhysRevLett.109.160602
- 843 Doi, E., & Lewicki, M. S. (2014). A Simple Model of Optimal Population Coding for Sensory Systems. *Plos*  
844 *Computational Biology*, 10(8). doi:10.1371/journal.pcbi.1003761
- 845 Domurat, A., Kowalczyk, O., Idzikowska, K., Borzymowska, Z., & Nowak-Przygodzka, M. (2015). Bayesian  
846 probability estimates are not necessary to make choices satisfying Bayes' rule in elementary  
847 situations. *Frontiers in Psychology*, 6. doi:10.3389/fpsyg.2015.01194
- 848 Doucet, A., De Freitas, N., & Gordon, N. (2001). *Sequential Monte Carlo methods in practice*. New York:  
849 Springer.

- 850 Doya, K. (2007). *Bayesian brain : probabilistic approaches to neural coding*. Cambridge, Mass.: MIT Press.
- 851 Eatock, R. A. (2018). Specializations for Fast Signaling in the Amniote Vestibular Inner Ear. *Integrative*  
852 *and Comparative Biology*, 58(2), 341-350. doi:10.1093/icb/icy069 %J Integrative and  
853 Comparative Biology
- 854 Eliasmith, C., & Martens, J. (2011). Normalization for probabilistic inference with neurons. *Biological*  
855 *Cybernetics*, 104(4-5), 251-262. doi:10.1007/s00422-011-0433-y
- 856 Fernandez, C., & Goldberg, J. M. (1976). PHYSIOLOGY OF PERIPHERAL NEURONS INNERVATING OTOLITH  
857 ORGANS OF SQUIRREL-MONKEY .1. RESPONSE TO STATIC TILTS AND TO LONG-DURATION  
858 CENTRIFUGAL FORCE. *Journal of Neurophysiology*, 39(5), 970-984.
- 859 Folks, J. L., & Chhikara, R. S. (1978). Inverse Gaussian Distribution and Its Statistical Application - Review.  
860 *Journal of the Royal Statistical Society Series B-Methodological*, 40(3), 263-289.
- 861 Gelman, A., Carlin, J. B., Stern, H. S., Dunson, D. B., Vehtari, A., & Rubin, D. B. (2013). *Bayesian Data*  
862 *Analysis* (3 ed.): Chapman-Hall.
- 863 Gigerenzer, G., & Gaissmaier, W. (2011). Heuristic Decision Making. In S. T. Fiske, D. L. Schacter, & S. E.  
864 Taylor (Eds.), *Annual Review of Psychology*, Vol 62 (Vol. 62, pp. 451-482). Palo Alto: Annual  
865 Reviews.
- 866 Glowatzki, E., Grant, L., & Fuchs, P. (2008). Hair cell afferent synapses. *Current Opinion in Neurobiology*,  
867 18(4), 389-395. doi:10.1016/j.conb.2008.09.006
- 868 Goldberg, D. H., Sripati, A. P., & Andreou, A. G. (2003). Energy efficiency in a channel model for the  
869 spiking axon. *Neurocomputing*, 52-4, 39-44. doi:10.1016/s0925-2312(02)00770-1
- 870 Goldberg, J. M. (2000). Afferent diversity and the organization of central vestibular pathways.  
871 *Experimental Brain Research*, 130(3), 277-297. doi:10.1007/s002210050033
- 872 Goldberg, J. M., & Fernandez, C. (1971a). PHYSIOLOGY OF PERIPHERAL NEURONS INNERVATING  
873 SEMICIRCULAR CANALS OF SQUIRREL MONKEY .1. RESTING DISCHARGE AND RESPONSE TO  
874 CONSTANT ANGULAR ACCELERATIONS. *Journal of Neurophysiology*, 34(4), 635-&.
- 875 Goldberg, J. M., & Fernandez, C. (1971b). PHYSIOLOGY OF PERIPHERAL NEURONS INNERVATING  
876 SEMICIRCULAR CANALS OF SQUIRREL MONKEY .3. VARIATIONS AMONG UNITS IN THEIR  
877 DISCHARGE PROPERTIES. *Journal of Neurophysiology*, 34(4), 676-&.
- 878 Goldberg, J. M., & Fernandez, C. (1980). EFFERENT VESTIBULAR SYSTEM IN THE SQUIRREL-MONKEY -  
879 ANATOMICAL LOCATION AND INFLUENCE ON AFFERENT ACTIVITY. *Journal of Neurophysiology*,  
880 43(4), 986-1025.
- 881 Goldberg, J. M., Wilson, V. J., Cullen, K. E., Angelaki, D. E., Broussard, D. M., Buttner-Ennever, J. A., . . .  
882 Minor, L. B. (2012). *The vestibular system : a sixth sense*. Oxford ; New York: Oxford University  
883 Press.
- 884 Haight, F. A. (1967). *Handbook of the Poisson distribution*. New York,: Wiley.
- 885 Hasenstaub, A., Otte, S., Callaway, E., & Sejnowski, T. J. (2010). Metabolic cost as a unifying principle  
886 governing neuronal biophysics. *Proceedings of the National Academy of Sciences of the United*  
887 *States of America*, 107(27), 12329-12334. doi:10.1073/pnas.0914886107
- 888 Honrubia, V., Hoffman, L. F., Sitko, S., & Schwartz, I. R. (1989). Anatomic and Physiological Correlates in  
889 Bullfrog Vestibular Nerve. *Journal of Neurophysiology*, 61(4), 688-701.
- 890 Hudspeth, A. J. (1983). MECHANOELECTRICAL TRANSDUCTION BY HAIR-CELLS IN THE  
891 ACOUSTICOLATERALIS SENSORY SYSTEM. *Annual Review of Neuroscience*, 6, 187-215.  
892 doi:10.1146/annurev.ne.06.030183.001155
- 893 Hudspeth, A. J., & Markin, V. S. (1994). THE EARS GEARS - MECHANOELECTRICAL TRANSDUCTION BY  
894 HAIR-CELLS. *Physics Today*, 47(2), 22-28. doi:10.1063/1.881410
- 895 Hullar, T. E., Della Santina, C. C., Hirvonen, T., Lasker, D. M., Carey, J. P., & Minor, L. B. (2005). Responses  
896 of irregularly discharging chinchilla semicircular canal vestibular-nerve afferents during high-

- 897 frequency head rotations. *Journal of Neurophysiology*, 93(5), 2777-2786. doi:DOI  
898 10.1152/jn.01002.2004
- 899 Jaynes, E. T., & Bretthorst, G. L. (2003). *Probability theory : the logic of science*. Cambridge, UK ; New  
900 York, NY: Cambridge University Press.
- 901 Jones, M., & Love, B. C. (2011). Bayesian Fundamentalism or Enlightenment? On the explanatory status  
902 and theoretical contributions of Bayesian models of cognition. *Behavioral and Brain Sciences*,  
903 34(4), 169-+. doi:10.1017/s0140525x10003134
- 904 Knill, D. C., & Pouget, A. (2004). The Bayesian brain: the role of uncertainty in neural coding and  
905 computation. *Trends in Neurosciences*, 27(12), 712-719.  
906 doi:<http://dx.doi.org/10.1016/j.tins.2004.10.007>
- 907 Knill, D. C., & Richards, W. (1996). *Perception as Bayesian inference*. Cambridge, U.K. ; New York:  
908 Cambridge University Press.
- 909 Koch, C. (1999). *BIOPHYSICS OF COMPUTATION Information Processing in Single Neurons*: Oxford Univ  
910 Press, 198 Madison Avenue, New York, Ny 10016 USA.
- 911 Kording, K. (2007). Decision theory: What "should" the nervous system do? *Science*, 318(5850), 606-610.  
912 doi:10.1126/science.1142998
- 913 Kording, K. P., & Wolpert, D. M. (2006). Bayesian decision theory in sensorimotor control. *Trends in*  
914 *Cognitive Sciences*, 10(7), 319-326. doi:DOI 10.1016/j.tics.2006.05.003
- 915 Kruschke, J. K. (2015). *Doing Bayesian data analysis : a tutorial with R, JAGS, and Stan* (Edition 2. ed.).  
916 Boston: Academic Press.
- 917 Kullback, S., & Leibler, R. A. (1951). ON INFORMATION AND SUFFICIENCY. *Annals of Mathematical*  
918 *Statistics*, 22(1), 79-86. doi:10.1214/aoms/1177729694
- 919 Landolt, J. P., & Correia, M. J. (1978). NEUROMATHEMATICAL CONCEPTS OF POINT PROCESS THEORY.  
920 *Ieee Transactions on Biomedical Engineering*, 25(1), 1-12. doi:10.1109/tbme.1978.326370
- 921 Lansky, P., Sacerdote, L., & Zucca, C. (2016). The Gamma renewal process as an output of the diffusion  
922 leaky integrate-and-fire neuronal model. *Biological Cybernetics*, 110(2-3), 193-200.  
923 doi:10.1007/s00422-016-0690-x
- 924 Laughlin, S. B. (2001). Energy as a constraint on the coding and processing of sensory information.  
925 *Current Opinion in Neurobiology*, 11(4), 475-480. doi:10.1016/s0959-4388(00)00237-3
- 926 Leiva, V., Tejo, M., Guiraud, P., Schmachtenberg, O., Orio, P., & Marmolejo-Ramos, F. (2015). Modeling  
927 neural activity with cumulative damage distributions. *Biological Cybernetics*.  
928 doi:10.1007/s00422-015-0651-9
- 929 Levy, W. B. (2006). *A Bayesian constraint on neural computation*. New York: Ieee.
- 930 Levy, W. B., & Baxter, R. A. (1996). Energy efficient neural codes. *Neural Computation*, 8(3), 531-543.  
931 doi:10.1162/neco.1996.8.3.531
- 932 Lewis, J. E., Gilmour, K. M., Moorhead, M. J., Perry, S. F., & Markham, M. R. (2014). Action Potential  
933 Energetics at the Organismal Level Reveal a Trade-Off in Efficiency at High Firing Rates. *Journal*  
934 *of Neuroscience*, 34(1), 197-201. doi:10.1523/jneurosci.3180-13.2014
- 935 Louie, K., Khaw, M. W., & Glimcher, P. W. (2013). Normalization is a general neural mechanism for  
936 context-dependent decision making. *Proceedings of the National Academy of Sciences of the*  
937 *United States of America*, 110(15), 6139-6144. doi:10.1073/pnas.1217854110
- 938 Lowenstein, O., & Sand, A. (1940). The individual and integrated activity of the semicircular canals of the  
939 elasmobranch labyrinth. *Journal of Physiology-London*, 99(1), 89-101.
- 940 MacNeilage, P. R., Ganesan, N., & Angelaki, D. E. (2008). Computational Approaches to Spatial  
941 Orientation: From Transfer Functions to Dynamic Bayesian Inference. *Journal of*  
942 *Neurophysiology*, 100(6), 2981-2996. doi:10.1152/jn.90677.2008

- 943 Marconi, U. M. B., Puglisi, A., Rondoni, L., & Vulpiani, A. (2008). Fluctuation–dissipation: Response  
944 theory in statistical physics. *Physics Reports*, 461(4–6), 111-195.  
945 doi:<http://dx.doi.org/10.1016/j.physrep.2008.02.002>
- 946 Markin, V. S., & Hudspeth, A. J. (1995). GATING-SPRING MODELS OF MECHANOELECTRICAL  
947 TRANSDUCTION BY HAIR-CELLS OF THE INTERNAL EAR. *Annual Review of Biophysics and*  
948 *Biomolecular Structure*, 24, 59-83.
- 949 McNamara, J. M., Green, R. F., & Olsson, O. (2006). Bayes' theorem and its applications in animal  
950 behaviour. *Oikos*, 112(2), 243-251. doi:10.1111/j.0030-1299.2006.14228.x
- 951 McPherson, D. R. (2018). Sensory Hair Cells: An Introduction to Structure and Physiology. *Integrative and*  
952 *Comparative Biology*, 58(2), 282-300. doi:10.1093/icb/icy064 %J Integrative and Comparative  
953 Biology
- 954 Mejias, J. F., Payeur, A., Selin, E., Maler, L., & Longtin, A. (2014). Subtractive, divisive and non-monotonic  
955 gain control in feedforward nets linearized by noise and delays. *Frontiers in Computational*  
956 *Neuroscience*, 8, 15. doi:10.3389/fncom.2014.00019
- 957 Nelder, J. A., & Mead, R. (1965). A Simplex Method for Function Minimization. *Computer Journal*, 7(4),  
958 308-313. doi:10.1093/comjnl/7.4.308
- 959 Nelson, M. E. (1994). A mechanism for neuronal gain control by descending pathways. *Neural*  
960 *Computation*, 6(2), 242-254. doi:10.1162/neco.1994.6.2.242
- 961 Niven, J. E. (2016). Neuronal energy consumption: biophysics, efficiency and evolution. *Current Opinion*  
962 *in Neurobiology*, 41, 129-135. doi:10.1016/j.conb.2016.09.004
- 963 Niven, J. E., & Laughlin, S. B. (2008). Energy limitation as a selective pressure on the evolution of sensory  
964 systems. *Journal of Experimental Biology*, 211(11), 1792-1804. doi:10.1242/jeb.017574
- 965 O'Reilly, J. X., Jbabdi, S., & Behrens, T. E. J. (2012). How can a Bayesian approach inform neuroscience?  
966 *European Journal of Neuroscience*, 35(7), 1169-1179. doi:10.1111/j.1460-9568.2012.08010.x
- 967 Olsen, S. R., Bhandawat, V., & Wilson, R. I. (2010). Divisive Normalization in Olfactory Population Codes.  
968 *Neuron*, 66(2), 287-299. doi:10.1016/j.neuron.2010.04.009
- 969 Ostwald, D., Spitzer, B., Guggenmos, M., Schmidt, T. T., Kiebel, S. J., & Blankenburg, F. (2012). Evidence  
970 for neural encoding of Bayesian surprise in human somatosensation. *Neuroimage*, 62(1), 177-  
971 188. doi:<http://dx.doi.org/10.1016/j.neuroimage.2012.04.050>
- 972 Paulin, M. G. (1989). A Kalman filter theory of the cerebellum. In M. A. Arbib & S.-I. Amari (Eds.),  
973 *Dynamic Interactions in Neural Networks: Models and Data* (pp. 2239-2260). New York:  
974 Springer-Verlag.
- 975 Paulin, M. G. (1993). The Role of the Cerebellum in Motor Control and Perception. *Brain Behavior and*  
976 *Evolution*, 41(1), 39-50.
- 977 Paulin, M. G. (2005). Evolution of the cerebellum as a neuronal machine for Bayesian state estimation.  
978 *Journal of Neural Engineering*, 2(3). doi:10.1088/1741-2560/2/3/s06
- 979 Paulin, M. G., & Hoffman, L. F. (1999). Modelling the firing pattern of bullfrog vestibular neurons  
980 responding to naturalistic stimuli. *Neurocomputing*, 26-7, 223-228.
- 981 Paulin, M. G., & Hoffman, L. F. (2001). Optimal firing rate estimation. *Neural Networks*, 14(6-7), 877-881.
- 982 Paulin, M. G., & Hoffman, L. F. (2011, 26-28 July 2011). *Bayesian head state prediction: Computing the*  
983 *dynamic prior with spiking neurons*. Paper presented at the 2011 Seventh International  
984 Conference on Natural Computation.
- 985 Paulin, M. G., & Hoffman, L. F. (2019). Models of vestibular semicircular canal afferent neuron firing  
986 activity. *Journal of Neurophysiology*, 122(6), 2548-2567. doi:10.1152/jn.00087.2019
- 987 Prost, J., Joanny, J. F., & Parrondo, J. M. R. (2009). Generalized Fluctuation–Dissipation Theorem for  
988 Steady-State Systems. *Physical Review Letters*, 103(9). doi:10.1103/PhysRevLett.103.090601
- 989 Ramirez, J. C., & Marshall, J. A. R. (2017). Can natural selection encode Bayesian priors? *Journal of*  
990 *Theoretical Biology*, 426, 57-66. doi:10.1016/j.jtbi.2017.05.017

- 991 Roberts, W. M., Howard, J., & Hudspeth, A. J. (1988). HAIR-CELLS - TRANSDUCTION, TUNING, AND  
992 TRANSMISSION IN THE INNER-EAR. *Annual Review of Cell Biology*, 4, 63-92.  
993 doi:10.1146/annurev.cb.04.110188.000431
- 994 Schwarz, W. (2001). The ex-Wald distribution as a descriptive model of response times. *Behavior*  
995 *Research Methods Instruments & Computers*, 33(4), 457-469. doi:10.3758/bf03195403
- 996 Schwarz, W. (2002). ON THE CONVOLUTION OF INVERSE GAUSSIAN AND EXPONENTIAL RANDOM  
997 VARIABLES. *Communications in Statistics - Theory and Methods*, 31(12), 2113-2121.  
998 doi:10.1081/STA-120017215
- 999 Selva, P., & Oman, C. M. (2012). Relationships between Observer and Kalman Filter models for human  
1000 dynamic spatial orientation. *Journal of Vestibular Research-Equilibrium & Orientation*, 22(2-3),  
1001 69-80. doi:10.3233/ves-2012-0451
- 1002 Sengupta, B., & Stemmler, M. B. (2014). Power Consumption During Neuronal Computation.  
1003 *Proceedings of the IEEE*, 102(5), 738-750. doi:10.1109/jproc.2014.2307755
- 1004 Shimokawa, T., Koyama, S., & Shinomoto, S. (2010). A characterization of the time-rescaled gamma  
1005 process as a model for spike trains. *Journal of Computational Neuroscience*, 29(1-2), 183-191.  
1006 doi:10.1007/s10827-009-0194-y
- 1007 Sigg, D. (2014). Modeling ion channels: past, present, and future. *The Journal of general physiology*,  
1008 144(1), 7-26. doi:10.1085/jgp.201311130
- 1009 Silver, R. A. (2010). Neuronal arithmetic. *Nature Reviews Neuroscience*, 11(7), 474-489.  
1010 doi:10.1038/nrn2864
- 1011 Smith, G. D. (2002). Modeling the Stochastic Gating of Ion Channels. In C. P. Fall, E. S. Marland, J. M.  
1012 Wagner, & J. J. Tyson (Eds.), *Computational Cell Biology* (pp. 285-319). New York, NY: Springer  
1013 New York.
- 1014 Sterling, P., & Laughlin, S. (2015). *Principles of Neural Design*. Cambridge, UK: MIT Press.
- 1015 Torre, V., Ashmore, J. F., Lamb, T. D., & Menini, A. (1995). Transduction and adaptation in sensory  
1016 receptor cells. *Journal of Neuroscience*, 15(12), 7757-7768.
- 1017 Valone, T. J. (2006). Are animals capable of Bayesian updating? An empirical review. *Oikos*, 112(2), 252-  
1018 259.
- 1019 van Hateren, J. H. (1992). A theory of maximizing sensory information. *Biological Cybernetics*, 68(1), 23-  
1020 29. doi:10.1007/bf00203134
- 1021 van Netten, S. M., & Kros, C. J. (2000). Gating energies and forces of the mammalian hair cell transducer  
1022 channel and related hair bundle mechanics. *Proceedings of the Royal Society B-Biological*  
1023 *Sciences*, 267(1455), 1915-1923.
- 1024 Vollrath, M. A., Kwan, K. Y., & Corey, D. P. (2007). The micromachinery of mechanotransduction in hair  
1025 cells. In *Annual Review of Neuroscience* (Vol. 30, pp. 339-365). Palo Alto: Annual Reviews.
- 1026 Xing, J., Berger, T., Sungkar, M., & Levy, W. B. (2015). Energy Efficient Neurons With Generalized Inverse  
1027 Gaussian Conditional and Marginal Hitting Times. *IEEE Transactions on Information Theory*,  
1028 61(8), 4390-4398. doi:10.1109/tit.2015.2444401
- 1029 Young, L. R. (2011). Optimal estimator models for spatial orientation and vestibular nystagmus.  
1030 *Experimental Brain Research*, 210(3-4), 465-476. doi:10.1007/s00221-011-2595-1
- 1031 Yu, L. C., & Yu, Y. G. (2017). Energy-Efficient Neural Information Processing in Individual Neurons and  
1032 Neuronal Networks. *Journal of Neuroscience Research*, 95(11), 2253-2266.  
1033 doi:10.1002/jnr.24131
- 1034 Yuille, A., & Kersten, D. (2006). Vision as Bayesian inference: analysis by synthesis? *Trends in Cognitive*  
1035 *Sciences*, 10(7), 301-308. doi:10.1016/j.tics.2006.05.002
- 1036 Zellner, A. (1988). Optimal Information Processing and Bayes Theorem. *American Statistician*, 42(4),  
1037 278-280. doi:10.2307/2685143
